# Supplementary material for: 2′-N-Guanidino,4′-C-ethylene bridged thymidine (GENA-T) modified oligonucleotide exhibits triplex formation with excellent enzymatic stability
Source: Royal Society of Chemistry journal article supplement (doi:10.1039/c4ra14721a), 2015-01-01

## Supporting Information

### **2'-*N*-Guanidino,4'-*C*-Ethylene Bridged Thymidine (GENA-T) modified Oligonucleotide Exhibits Triplex Formation with Excellent Enzymatic Stability**

Jharna Barman,<sup>a</sup> Deepanjali Gurav,<sup>b,c</sup> Oommen P. Oommen<sup>b</sup> and Oommen P. Varghese<sup>b</sup>

#### **Materials and Methods**

All chemicals were purchased from Sigma Aldrich, Sweden, unless otherwise stated. Chromatographic separations were performed on Merck G60 silica gel. Thin layer chromatography (TLC) was performed on Merck pre-coated silica gel 60 F<sub>254</sub> glass-backed plates. <sup>1</sup>H NMR spectra were recorded on Jeol JNM-ECP Series FT NMR system at a magnetic field strength of 9.4 T, operating at 400 MHz for <sup>1</sup>H with TMS (0.0 ppm) as internal standards. <sup>13</sup>C NMR spectra were recorded at 100 MHz, using the central peak of CDCl<sub>3</sub> (76.9 ppm) as an internal standard. <sup>31</sup>P NMR spectra were recorded at 81 MHz using 85% phosphoric acid as external standard. Chemical shifts are reported in ppm (δ scale). Compound names for the bicyclic structures are given according to the von Baeyer nomenclature. MALDI-TOF mass spectra were recorded in positive ion mode for oligonucleotides and for other compounds as indicated. The mass spectrometer was externally calibrated with a peptide mixture using alpha-cyano-4-hydroxycinnamic acids as matrix. Thermal denaturation experiments were performed on a PC-computer interfaced UV/VIS spectrophotometer with Peltier PTP-1+1 and PCB 1500 temperature controller system.

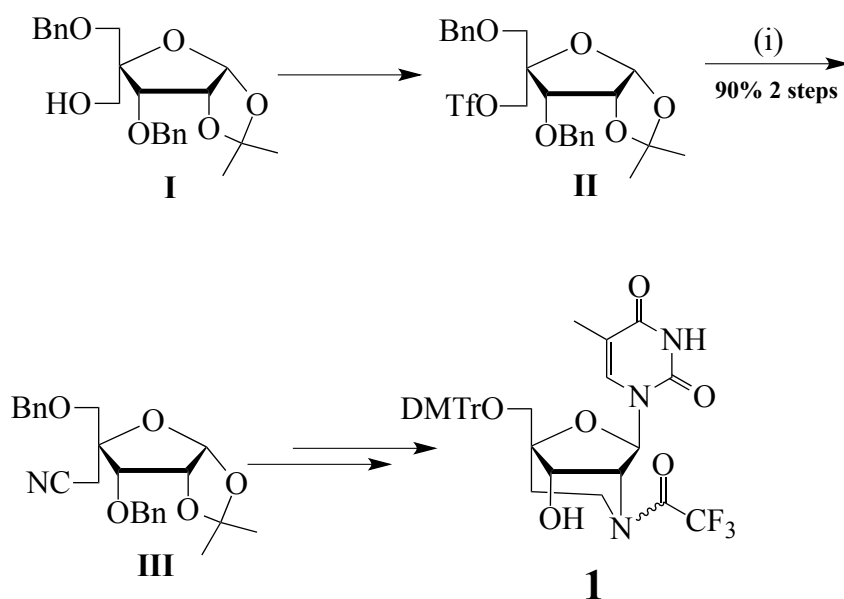

**Scheme S1.** Synthetic route for compound **1**.

*Reagents and conditions:* (i) (a) Tf<sub>2</sub>O, pyridine, CH<sub>2</sub>Cl<sub>2</sub>, 0 °C, 3 h; (b) acetone cyanohydrin, MeLi, LiH, DMF, r.t., 3 days. The synthetic procedure for other steps was identical with that of aza-ENA.

## Experimental Section

### **3,5-Di-O-benzyl-4-C-cyanomethyl-1,2-O-isopropylidene-R-D-ribofuranose (III).**

The sugar **I** (8.5 g, 21.25 mmol) was dissolved in an anhydrous dichloromethane/pyridine mixture (210 mL, 3:1, v/v) and cooled in an ice bath. To this solution, triflic anhydride (4.3 mL, 25.5 mmol) was added dropwise and stirred for 3 h under nitrogen atmosphere. The reaction was quenched with cold saturated aqueous NaHCO<sub>3</sub> and extracted with dichloromethane. The organic phase was dried over anhydrous MgSO<sub>4</sub> and evaporated under reduced pressure followed by co-evaporation with toluene (three times) and dichloromethane (three times) to give **II**. For preparing cyano sugar, we generated LiCN *in situ* by slightly modifying previously published article.<sup>1</sup> Briefly, MeLi in diethyl ether (1.6 M, 40 mL, 63.85 mmol) was added dropwise via syringe to an anhydrous hexane (50 mL) solution containing acetone cyanohydrin (8.75 mL, 95.86 mmol) at -10 °C under N<sub>2</sub>. The

resulting white suspension was warmed to room temperature and stirred for additional 30 min. Rotary evaporation of the suspension afforded LiCN. acetone as a white solid (98% yield for a 1:1 complex). Sugar **II** was dissolved in anhydrous DMF (50 mL) and was slowly added to the LiCN. acetone complex suspension in anhydrous DMF (90 mL). The reaction was stirred for 3 days at room temperature. The solvent was evaporated in vacuo, and the residue was dissolved in dichloromethane. Saturated aqueous NaHCO<sub>3</sub> was added to this solution and extracted with dichloromethane (three times). The organic phase was collected and dried over anhydrous MgSO<sub>4</sub> and evaporated under reduced pressure. The crude product was purified by silica gel column chromatography (0-20% ethylacetate in cyclohexane, v/v), which afforded **III** (7.9 g, 19.31 mmol, 90% after two steps). *R<sub>f</sub>* = 0.61 (60:40 cyclohexane/ ethylacetate (v/v)). All analytical data were identical to those previously reported.<sup>2</sup>

Synthesis of *N,N'*-di((2-cyanoethoxy)carbonyl)-*S*-methylisothiourea (**2**): This reagent was synthesized according to the previous report.<sup>3</sup>

**2-Cyanoethyl(((1*R*,5*R*,7*R*,8*S*)-5-(4,4'-dimethoxytrityloxymethyl)-8-hydroxy-7-(thymine-1-yl)-2-aza-6-oxabicyclo[3.2.1]octan-2-yl)((2-cyanoethoxy)carbonyl)amino)methylene)carbamate (**3**). Nucleoside 1 (100 mg, 0.14 mmol) was dissolved in 40% aqueous methylamine (0.15 mL) and stirred for 1.5 h, thereafter the solvent was evaporated, co-evaporated with anhydrous pyridine to remove traces of water and dissolved in 1.5 mL of dry CH<sub>2</sub>Cl<sub>2</sub>. To this 100 mg (0.36 mmol) of guanylation reagent and 0.08 mL (0.58 mmol) of triethylamine was added and stirred at r.t. for 4 days. The solvent was evaporated in vacuum and the crude product was purified by silica gel column chromatography (0-3% methanol in dichloromethane, v/v containing 1% pyridine) to afford **3** (58 mg, 48% in two steps). *R<sub>f</sub>* = 0.56 (CH<sub>2</sub>Cl<sub>2</sub>/CH<sub>3</sub>OH 94:6 v/v); MALDI-TOF *m/z* [M + Na]<sup>+</sup> found 821.5, calcd 821.3; <sup>13</sup>C NMR (100 MHz, CDCl<sub>3</sub> + DABCO): 164.2, 158.8, 155.0, 150.3, 144.4, 137.9, 134.4, 135.2, 135.0, 130.2, 129.1, 128.3, 128.1, 127.2, 125.3, 113.4, 110.4, 86.8, 86.4, 85.4, 65.7, 63.6, 61.2, 60.2, 55.3, 38.4, 29.7, 26.2, 21.5, 18.7, 18.4, 12.1.**

**2-Cyanoethyl(((1*R*,5*R*,7*R*,8*S*)-5-(4,4'-dimethoxytrityloxymethyl)-8-(((2-cyanoethoxy)(diisopropylamino)phosphino)oxy)-7-(thymine-1-yl)-2-aza-6-**

*oxabicyclo[3.2.1]octan-2-yl*(((2-cyanoethoxy)carbonyl)amino)methylene)carbamate (4). Compound 3 (100 mg, 0.12 mmol) was dissolved in 1.2 mL of dry CH<sub>2</sub>Cl<sub>2</sub>, diisopropylethylamine (0.12 mL, 0.66 mmol) was added at 0 °C followed by 2-cyanoethyl *N,N*-diisopropylphosphoramido chloridite (0.04 mL, 0.2 mmol). After 30 min. reaction was warmed to room temperature and stirred overnight. MeOH (0.5 mL) was added and stirring was continued for 5 min. thereafter saturated aqueous NaHCO<sub>3</sub> was added and extracted with freshly distilled CH<sub>2</sub>Cl<sub>2</sub> (3 × 20 mL). The organic phase was dried over anhydrous MgSO<sub>4</sub>, filtered and concentrated under reduced pressure. The crude residue was purified by silica gel column chromatography (40-100% CH<sub>2</sub>Cl<sub>2</sub> in cyclohexane containing 1% Et<sub>3</sub>N) afforded 4 (645 mg, 0.73 mmol, 61%) as a mixture of four isomers. *R<sub>f</sub>* = 0.7 (CH<sub>2</sub>Cl<sub>2</sub>/CH<sub>3</sub>OH 94:6 v/v); MALDI-TOF *m/z* [M + Na]<sup>+</sup> found 1044.6, calcd 1044.4; <sup>31</sup>P NMR (109.4 MHz, CDCl<sub>3</sub>): 150.7, 150.3, 149.3, 148.8.

#### ***Synthesis, deprotection and purification of ONs***

All oligonucleotides were synthesized using BioAutomation MerMade 4 DNA/RNA Synthesizer. For modified ONs containing aza-ENA-T units, fast deprotecting phosphoramidites (nucleobases were protected using the following groups: Ac for C, <sup>i</sup>Pr-PAC for G, and PAC for A) were used. These ONs were de-protected at room temperature by aqueous NH<sub>3</sub> treatment for 24 h. For GENA containing ONs, 50% piperidine in water was used to deprotect ONs from solid support, for 24 h at rt. The solid support was filtered, washed with water and evaporated. The crude material is further treated with aqueous NH<sub>3</sub> for 24 h. All ONs and the target RNA and DNA were purified by 20% polyacrylamide/7M urea) PAGE, extracted with 0.3 M NaOAc, desalted with C18-reverse phase cartridges and their purity (greater than 95%) was confirmed by PAGE.

#### ***<sup>32</sup>P Labelling of ONs***

The oligoribonucleotide, oligodeoxyribonucleotides were 5'-end labeled with <sup>32</sup>P using T4 polynucleotide kinase and [γ-<sup>32</sup>P] ATP by standard procedure. Labeled ONs and RNA were purified by 20% denaturing PAGE and specific activities were measured using Beckman LS 3801 counter.

### ***3'-Exonuclease degradation studies***

Stability of the ONs toward 3'-exonucleases was tested using snake venom phosphodiesterase from *Crotalus adamanteus*. All reactions were performed at 3  $\mu\text{M}$  DNA concentration (5'-end  $^{32}\text{P}$  labeled with specific activity 50,000 cpm) in 56 mM Tris-HCl (pH 7.9) and 4.4 mM  $\text{MgCl}_2$  at 21  $^\circ\text{C}$ . Exonuclease concentration of 17 ng/ $\mu\text{L}$  was used for digestion of oligonucleotides. Total reaction volume was 14  $\mu\text{L}$ . Aliquots (3  $\mu\text{L}$ ) were taken at 0, 2, 4, 9 and 24 h and quenched by addition to 7  $\mu\text{L}$  volume of 50 mM EDTA in 80% formamide. Reaction progress was monitored by 20% denaturing (7 M urea) PAGE and autoradiography.

### ***Stability studies in human serum***

ONs (6  $\mu\text{L}$ ) at 2  $\mu\text{M}$  concentration (5'-end  $^{32}\text{P}$  labeled with specific activity 90 000 cpm) were incubated in 26  $\mu\text{L}$  of human serum (male AB, Sigma Aldrich) at 21  $^\circ\text{C}$  (total reaction volume was 36  $\mu\text{L}$ ). Aliquots (3  $\mu\text{L}$ ) were taken at 0, 2, 4, 10, 24, 33 and 48 h, and quenched with 7  $\mu\text{L}$  quenching solution containing 50 mM EDTA in 80% formamide, resolved in 20% polyacrylamide denaturing (7 M urea) gel electrophoresis and visualized by autoradiography.

### ***UV melting experiments***

Determination of the  $T_m$  of the ON/RNA hybrids was carried out in the following buffer: 60 mM Tris-HCl at pH 7.5, 60 mM KCl, 0.8 mM  $\text{MgCl}_2$ , and 2 mM DTT. Absorbance was monitored at 260 nm in the temperature range from 20  $^\circ\text{C}$  to 70  $^\circ\text{C}$  using UV spectrophotometer equipped with PTP-1+1 Peltier system with the heating rate of 1  $^\circ\text{C}$  per minute. Prior to measurements, samples (1  $\mu\text{M}$  of ON and 1  $\mu\text{M}$  RNA mixture) were pre-annealed by heating to 80  $^\circ\text{C}$  for 5 min followed by slow cooling to 4  $^\circ\text{C}$  and 30 min equilibration at this temperature.  $T_m$  was determined as the temperature for half dissociation of the formed duplexes, which was determined by the first derivative of the melting curve.

To determine the  $T_m$  for triplexes, 7.0 mM  $\text{Na}_2\text{HPO}_4$  buffer pH 7, containing 140 mM KCl was used to give the total strand concentration of 1  $\mu\text{M}$ . The strands were annealed by heating the samples at 90  $^\circ\text{C}$  for 5 minutes followed by slow cooling to room temperature for 1 h. Absorbance was monitored at 260 nm in the temperature range from 20  $^\circ\text{C}$  to 85  $^\circ\text{C}$  using UV spectrophotometer equipped with PTP-1+1

Peltier system with the heating rate of 0.5 °C per minute.  $T_m$  was determined as mentioned above.

## Reference

1. J. A. Ciaccio, M. Smrta, William A. Maio and D. Rucando, *Tetrahedron Lett.*, 2004, **45**, 7201–7204.
2. O. P. Varghese, J. Barman, W. Pathmasiri, O. Plashkevych, D. Honcharenko and J. Chattopadhyaya, *J. Am. Chem. Soc.*, 2006, **128**, 15173–15187.
3. T. P. Prakash, A. Pulschl, E. Lesnik, V. Mohan, V. Tereshko, M. Egli and M. Manoharan, *Org. Lett.*, 2004, **6**, 1971–1974.

### 1) $^1\text{H}$ NMR spectra of **3**

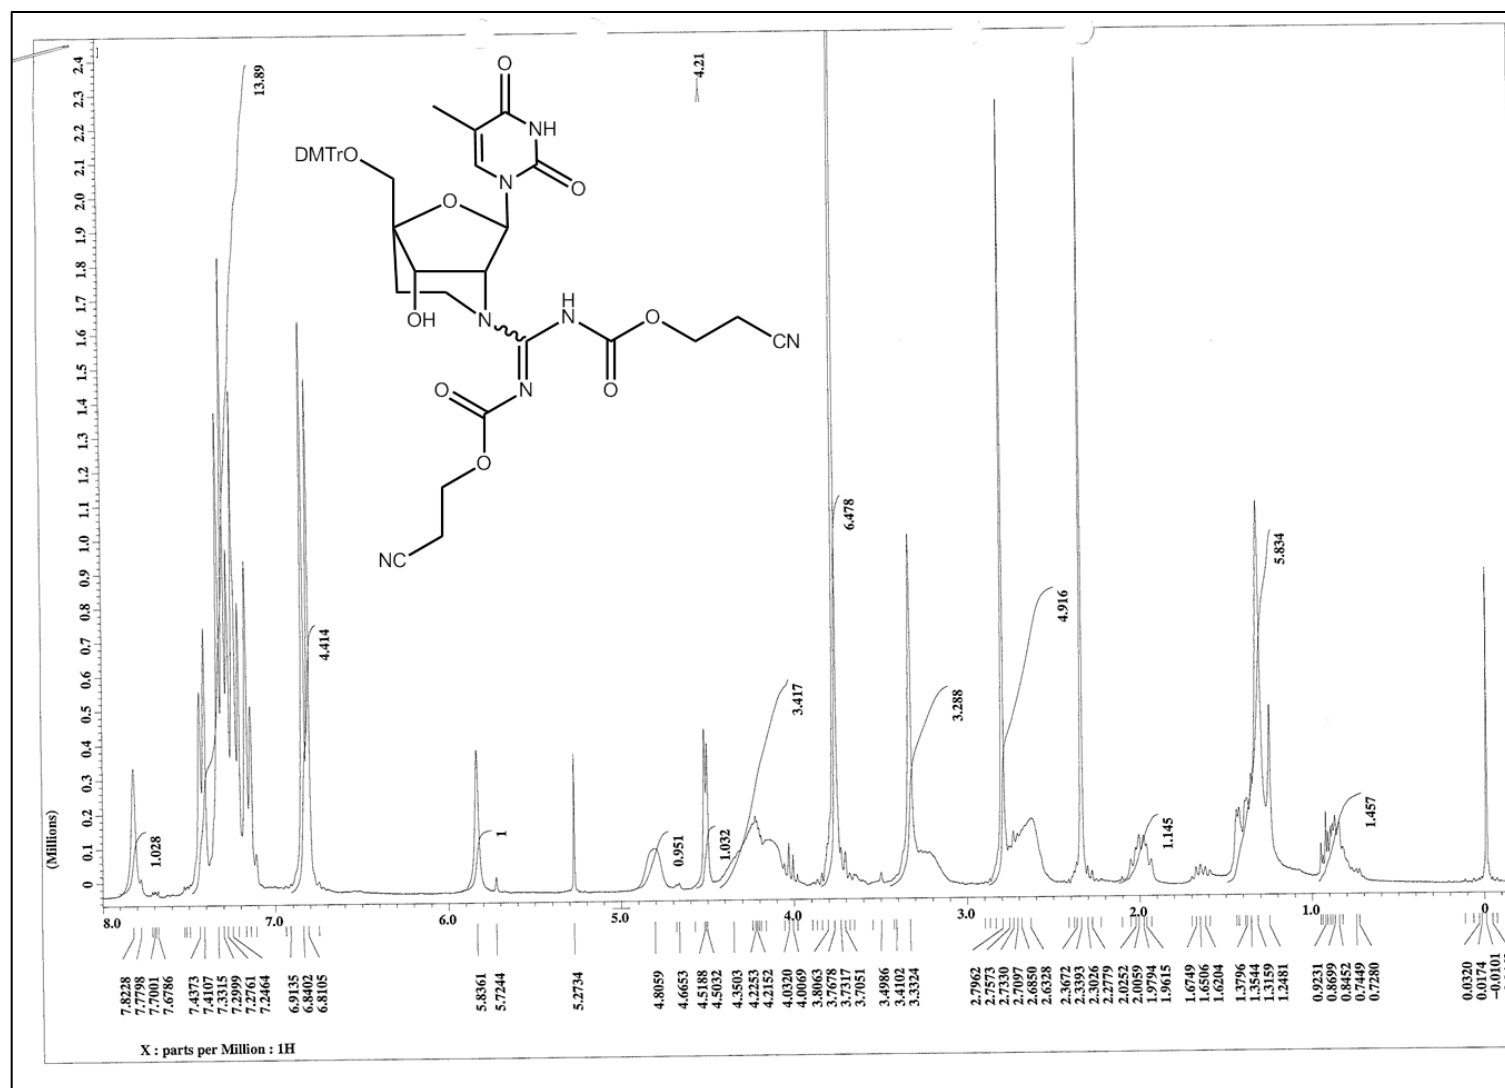

2)  $^{13}\text{C}$  spectra of 3

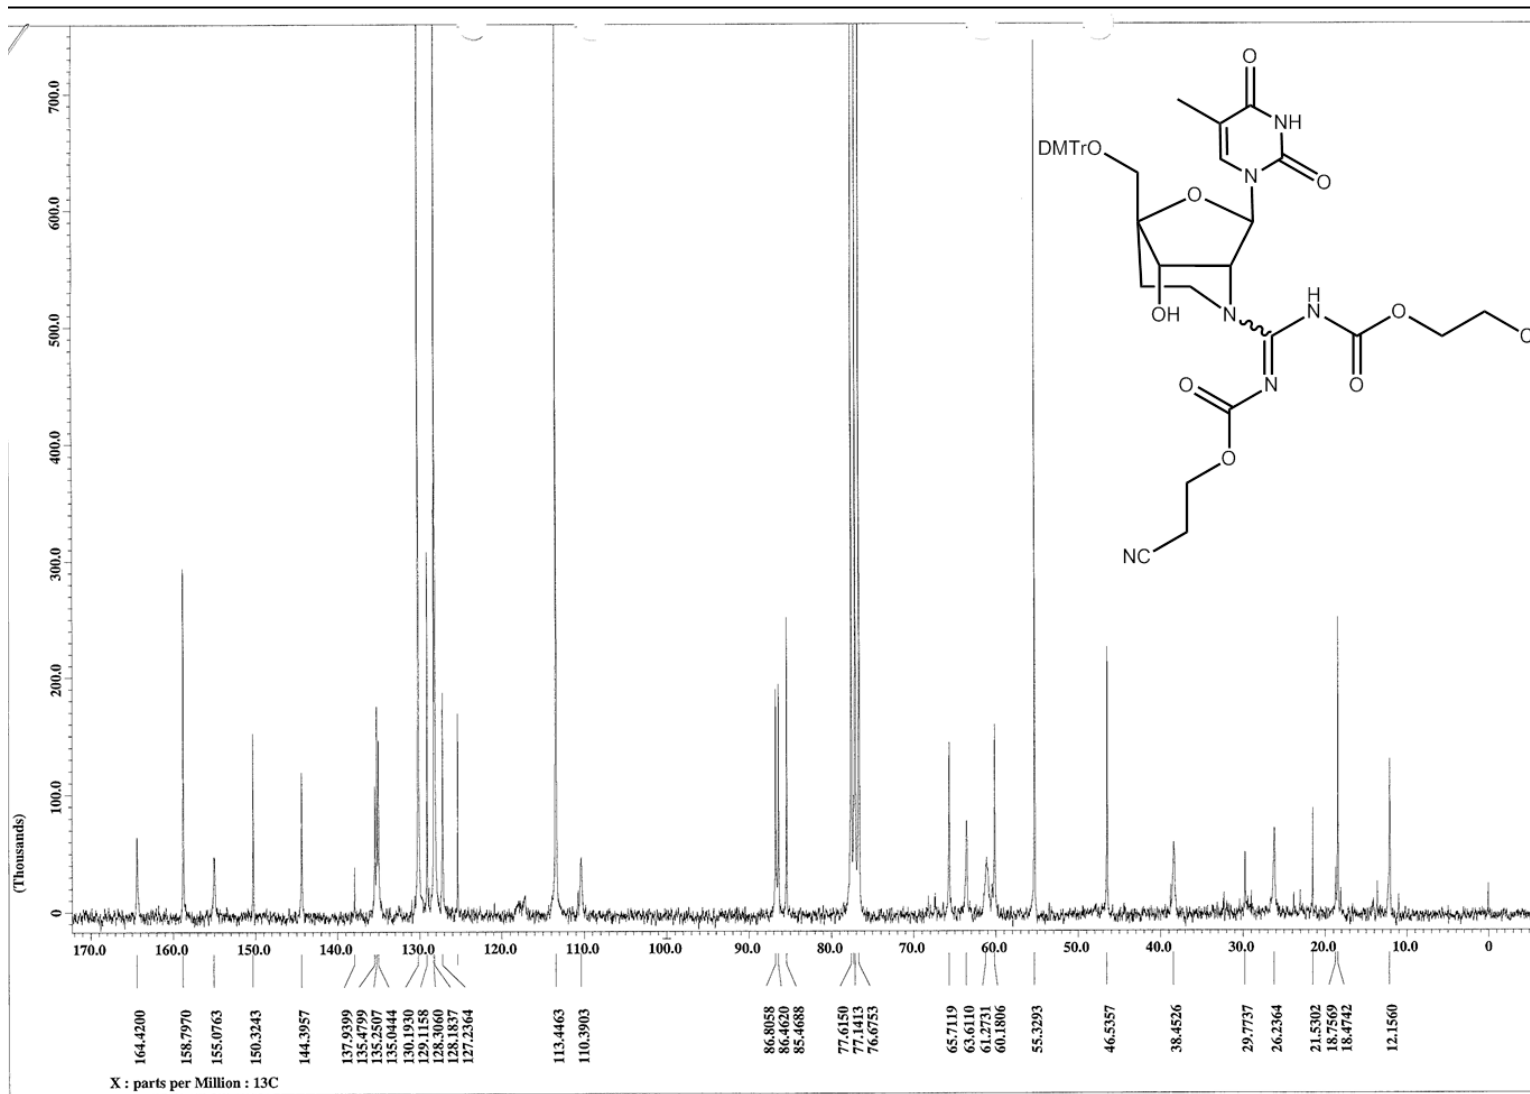

### 3) COSY spectra of 3

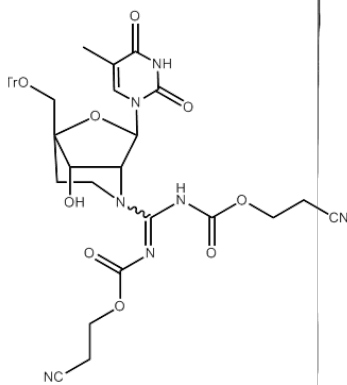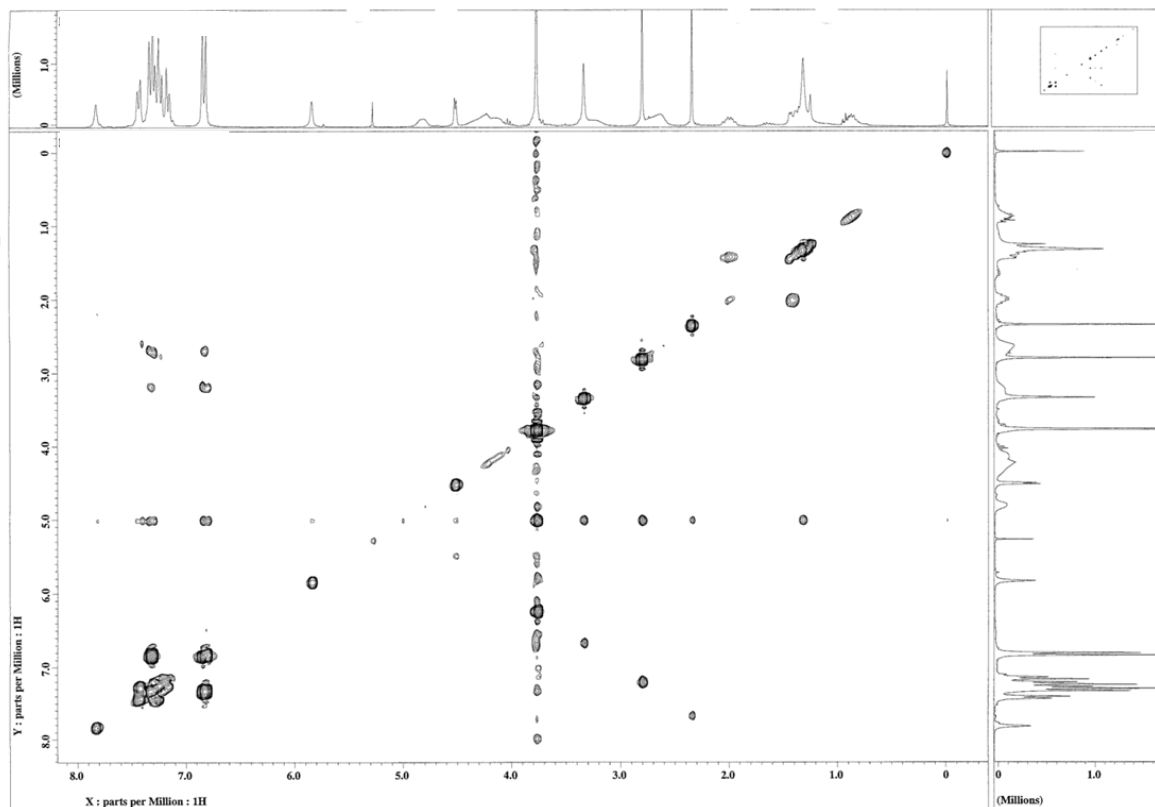



#### 4) CHSHF spectra of **3**

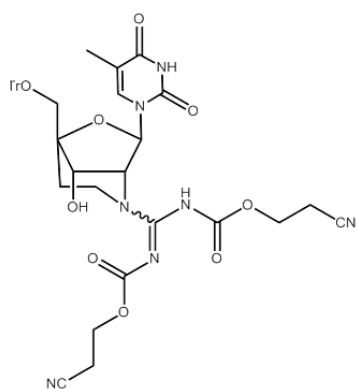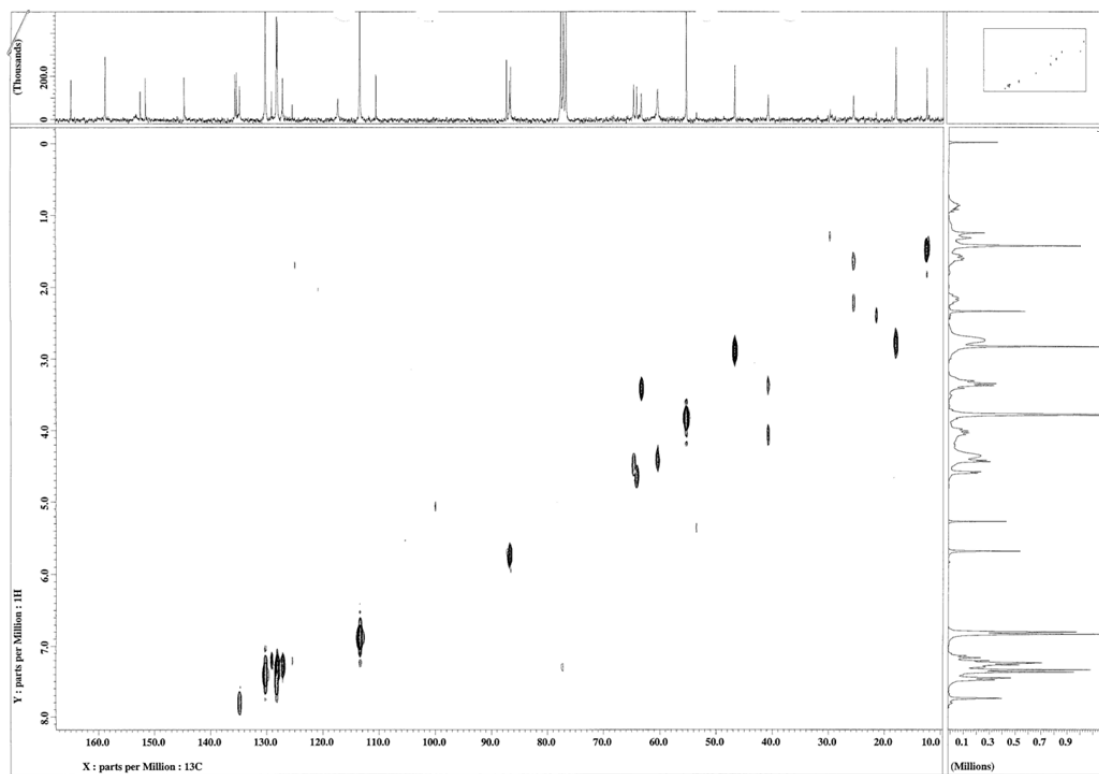

5)  $^{31}\text{P}$  NMR spectra of 4

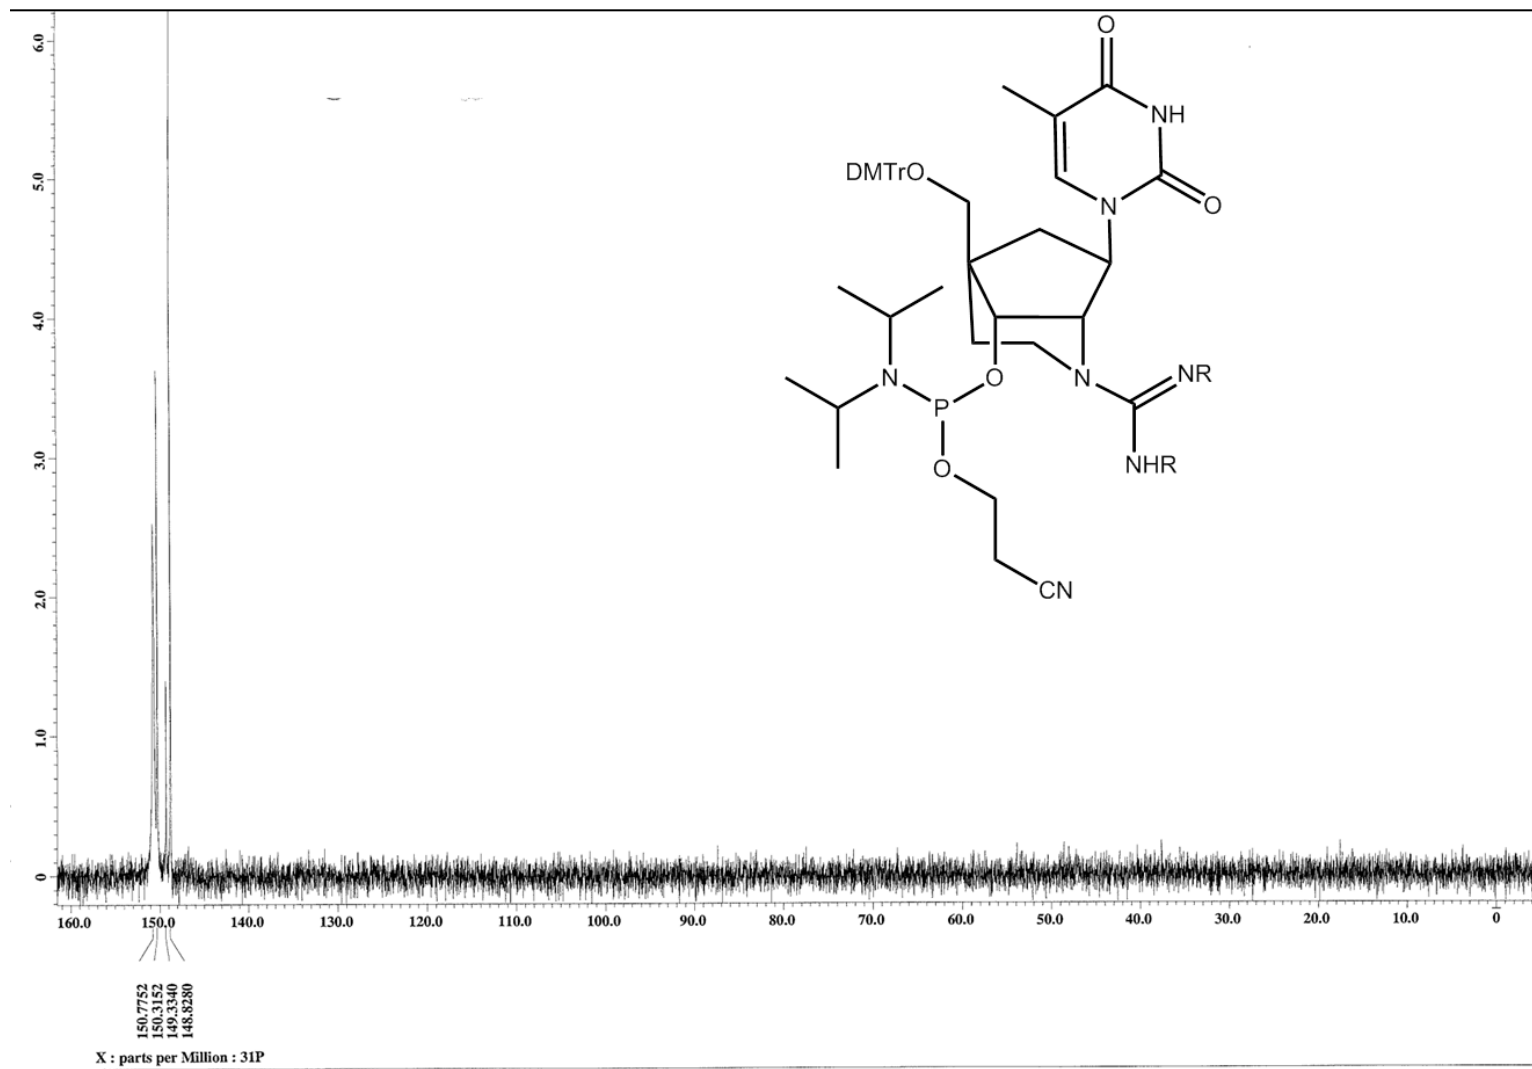

150.7752  
150.3152  
149.3340  
148.3280

X : parts per Million :  $^{31}\text{P}$

## 6) Mass spectra of 4

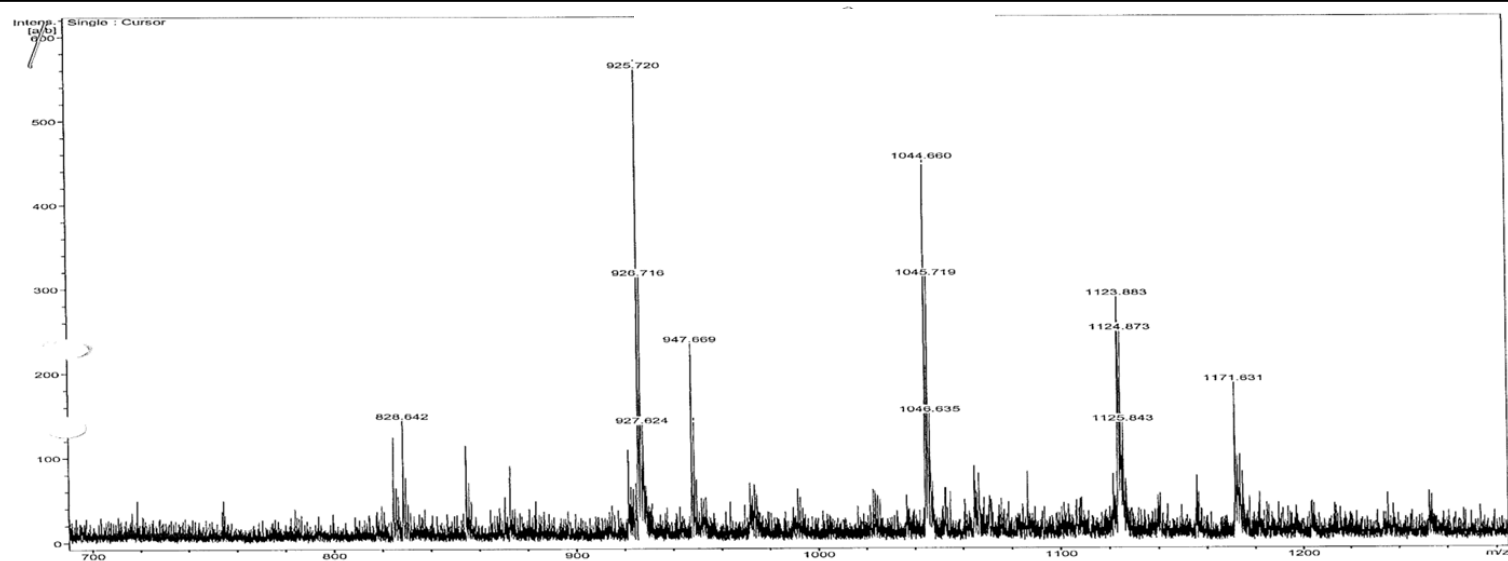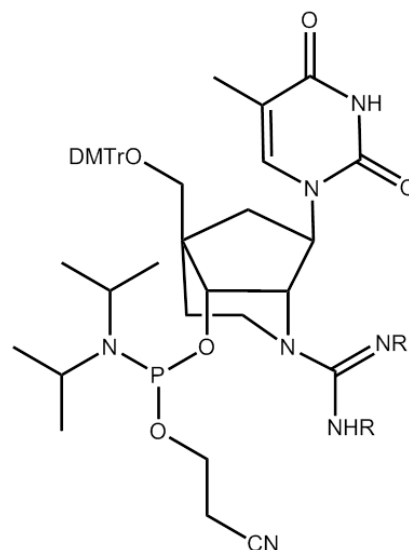

Supplement: c4ra14721a1.pdf [file c4ra14721a1.pdf]
